# Supplementary material for: Map-based cloning and characterization of BPH29, a B3 domain-containing recessive gene conferring brown planthopper resistance in rice
Source: PubMed Central journal article supplement (PMC4566989; doi:10.1093/jxb/erv318), 2015-07-01
Supplement: supp_erv318_Supporting_data.pdf [file supp_erv318_Supporting_data.pdf]

**Title:** Map-based cloning and characterization of *BPH29*, a B3 domain-containing recessive gene conferring brown planthopper resistance in rice

**Authors:** Ying Wang<sup>1</sup>, Liming Cao<sup>2</sup>, Yuexiong Zhang<sup>3</sup>, Changxiang Cao<sup>1</sup>, Fang Liu<sup>3</sup>, Fengkuan Huang<sup>4</sup>, Yongfu Qiu<sup>3</sup>, Rongbai Li<sup>3,\*</sup> and Xiaojin Lou<sup>1,\*</sup>

### **Supplementary Data**

**Supplementary Fig. S1.** Differences of *G5* between susceptible-parent TN1 and resistant-parent RBPH54.

**Supplementary Fig. S2.** Complementation test for *G4*.

**Supplementary Fig. S3.** Expression of *G5* alleles in transgenic lines.

**Supplementary Fig. S4.** BPH29-GFP fusion protein activity test.

**Supplementary Table S1.** Transcript levels of *BPH29* and *OsActin1* at different rice developmental stages

**Supplementary Table S2.** Primers used in this work

**Supplemental Figures:**

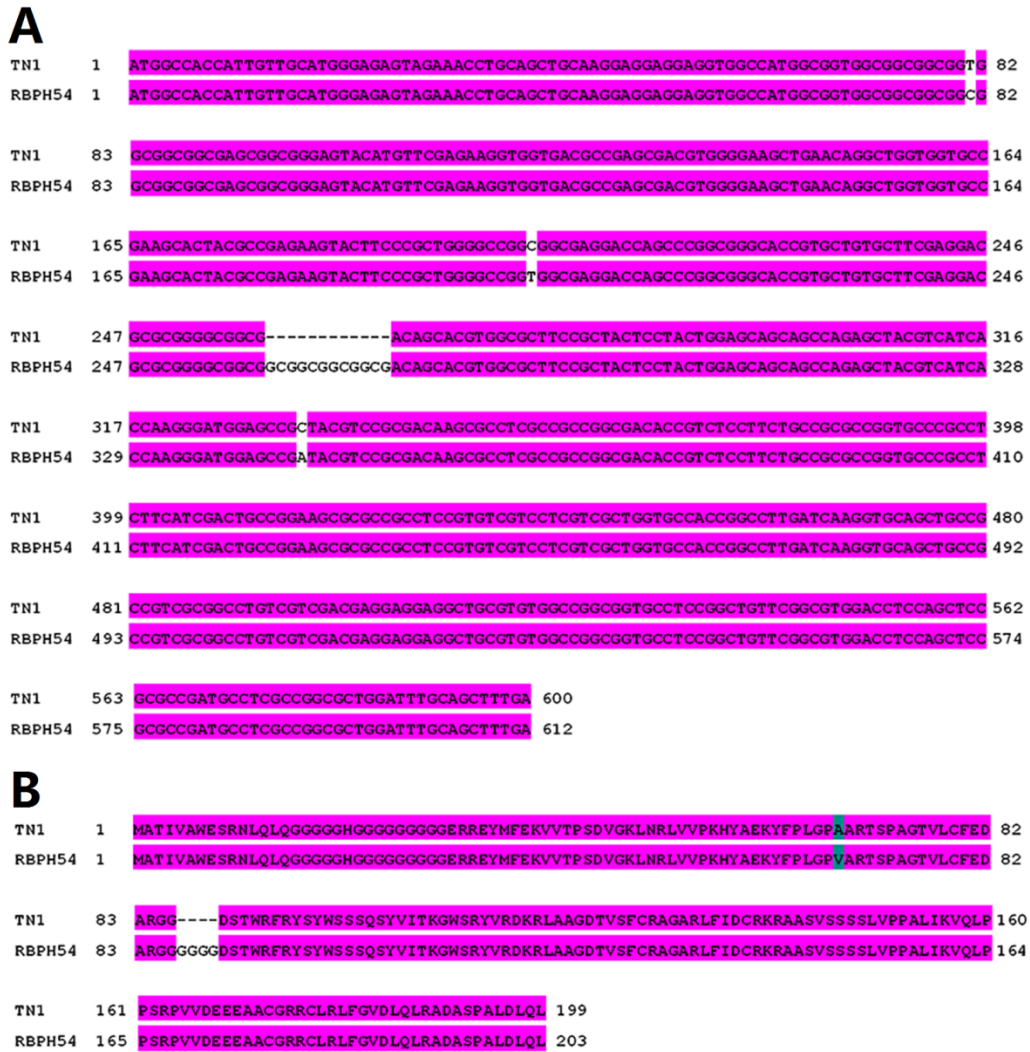

**Supplementary Fig. S1.** Differences of *G5* between susceptible-parent TN1 and resistant-parent RBPH54.

Alignments of *G5* coding regions cDNA sequences (A) and amino acids sequences (B). The results showed differences included three single nucleotide polymorphism, resulting in one single amino acid mutation from alanine to valine, and a 12-bp insertion corresponding to four glycines in RBPH54. Identical amino acids are in pink, similar amino acids are marked with green.

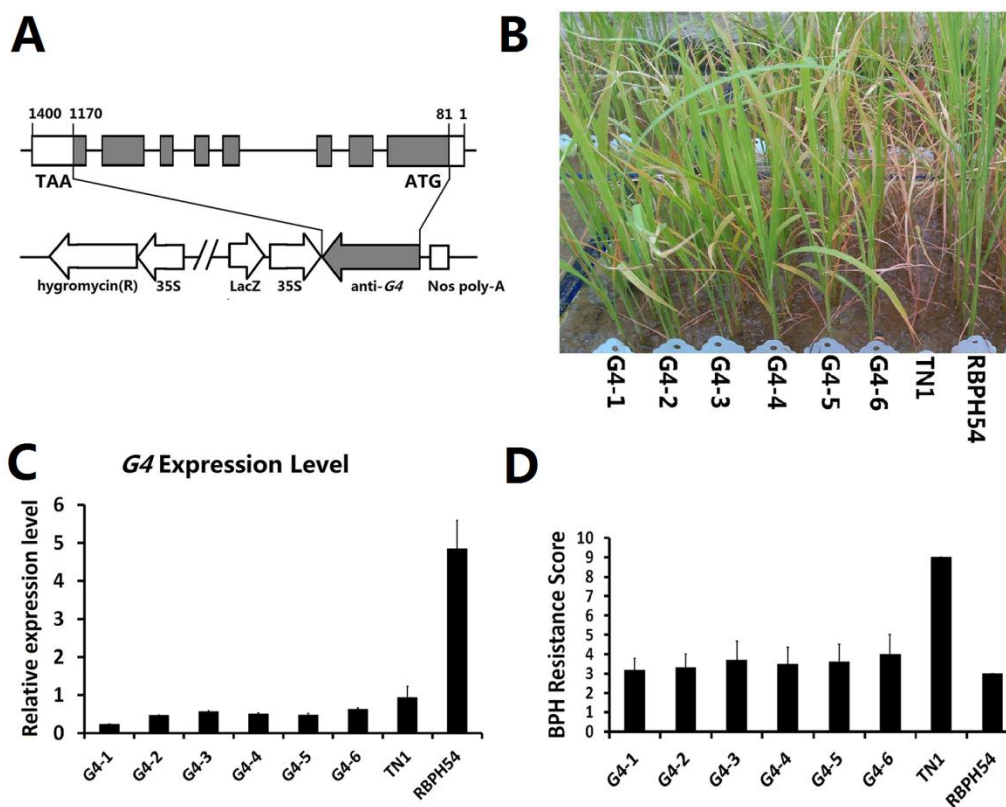

**Supplementary Fig. S2.** Complementation test for *G4*.

(A) Gene and vector structure of *G4*. The eight exons of *G4* are boxed, with the ORF indicated by a grey box. In the linear map of pCAMBIA1304, *G4* is assembled downstream of the 35S promoter in the antisense form.

(B) BPH-resistance bioassay of *G4*-transgenic lines at the seedling stage. G4-1 to G4-6, 35S::anti-*G4* transgenic T<sub>1</sub> lines; TN1 susceptible-parent control; RBPH54, resistant-parent control.

(C) qRT-PCR analysis of *G4* expression levels in transgenic lines. Data are means  $\pm$  SD ( $n = 3$  individuals) and expression levels are shown relative to *OsActin1*.

(D) BPH resistance scores of the *G4* transgenic lines. Their lower scores indicate their high resistance to BPH. Data are means  $\pm$  SD ( $n = 20$  plants). (B) and (D) show that *G4* transgenic lines retained their resistance from RBPH54 after transformation.

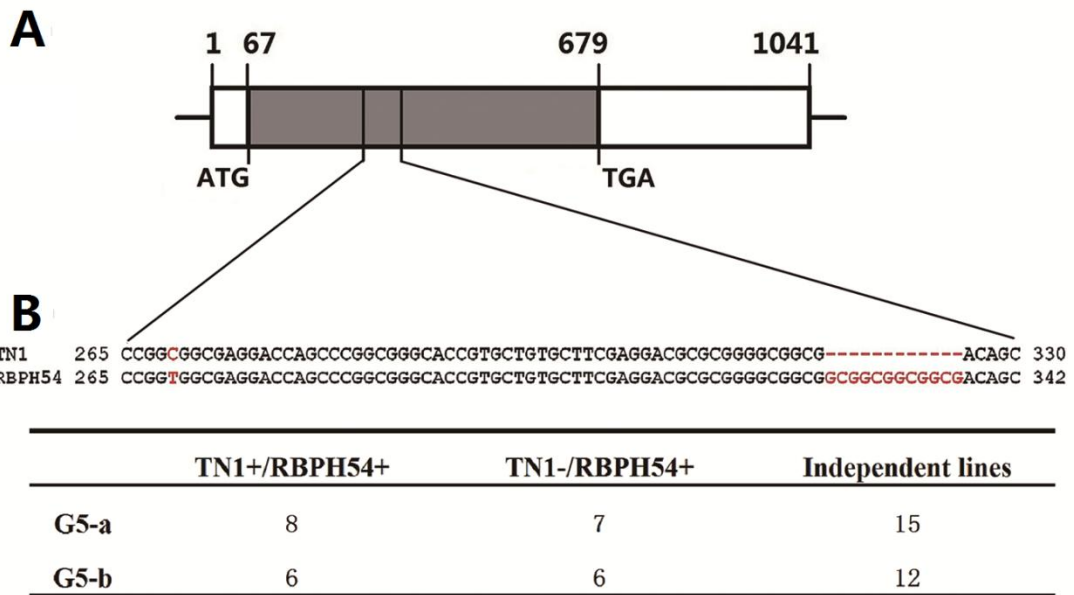

**Supplementary Fig. S3.** Expression of *G5* alleles in transgenic lines.

(A) Gene structure of *G5*. The ORF is indicated by a grey box, and the region with sequence differences between *G5* dominant and recessive alleles is delineated between the black lines.

(B) The alleles expressed in the *G5* transgenic lines. Both G5-a and G5-b transgenic lines were performed in resistant-parent RBPH54, and the recessive *G5* allele of RBPH54 were consequently detected in all the transgenic lines (RBPH54+). The transgenic lines that dominant *G5* allele of TN1 were also detected (TN1+/RBPH54+) were confirmed as positive transformants and selected to evaluate BPH resistance.

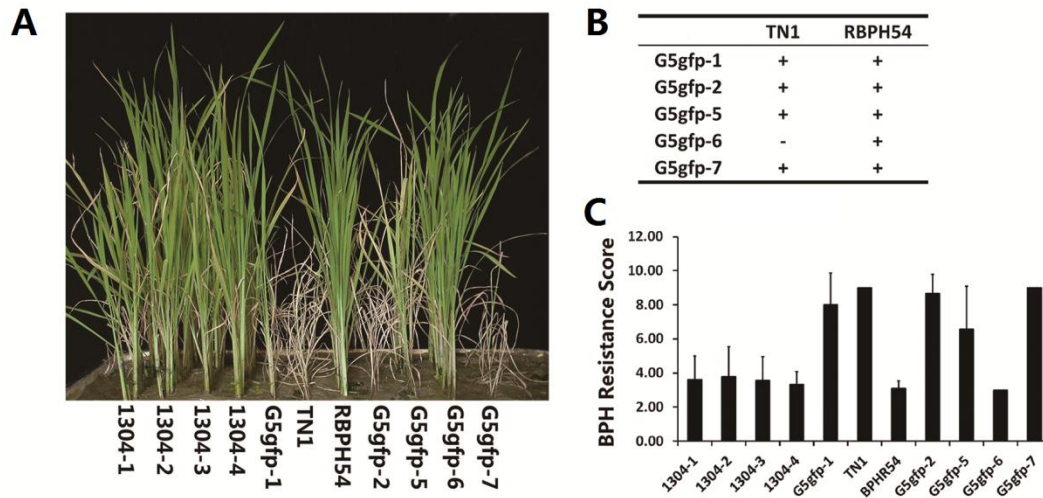

**Supplementary Fig. S4.** BPH29-GFP fusion protein activity test.

(A) BPH-resistance bioassay of BPH29-GFP fusion protein transgenic lines at the seedling stage. BPH29-GFP fusion protein was assembled into the vector pCAMBIA1304. 1304-1 to 1304-4, 35S::*GFP* transgenic T<sub>1</sub> lines; G5gfp-1 to G5gfp-7, 35S::*BPH29*::*GFP* transgenic T<sub>1</sub> lines; TN1 susceptible-parent control; RBPH54, resistant-parent control.

(B) The alleles expression in the 35S::*BPH29*::*GFP* transgenic lines. As described in Supplementary Fig. S3 legend, the transgenic lines that *G5* allele of both TN1 and RBPH54 were detected (TN1<sup>+</sup>/RBPH54<sup>+</sup>) were confirmed as positive transformants. The results corresponded with BPH-resistance bioassay.

(C) BPH resistance scores of BPH29-GFP fusion protein transgenic lines. G5gfp positive transformants lines showed higher scores, indicating their high susceptibility to BPH and the activity of BPH29-GFP fusion protein. The lower scores of 1304 control transgenic lines indicate their high resistance to BPH. Data are means  $\pm$  SD ( $n = 20$  plants).

**Supplemental Tables:****Supplemental Table S1.** Transcript levels of *BPH29* and *OsActin1* at different rice developmental stages<sup>a</sup>

| Number | Sample Name                        | Signal value <sup>b</sup> |             |                                |             |
|--------|------------------------------------|---------------------------|-------------|--------------------------------|-------------|
|        |                                    | <i>BPH29</i> (Os06g01860) |             | <i>OsActin1</i> (Os03g0718100) |             |
|        |                                    | Minghui 63                | Zhenshan 97 | Minghui 63                     | Zhenshan 97 |
| 1      | calli, T2, 15 days after induction | 9                         | 5           | 4580                           | 4593        |
| 2      | calli, T3, 15 days after induction | 25                        | 25          | 6284                           | 4618        |
| 3      | calli, 15 days after subculture    | 14                        | 38          | 4989                           | 3361        |
| 4      | calli, screening stage             | 36                        | 29          | 6657                           | 3912        |
| 5      | root, seedling with 2 tillers      | 1574                      | 3242        | 6759                           | 4570        |
| 6      | shoot, seedling with 2 tillers     | 21                        | 24          | 5915                           | 4254        |
| 7      | leaf and root at three-leaf stage  | 102                       | 129         | 11293                          | 12509       |
| 8      | flag leaf, 14 days after heading   | 17                        | 3           | 2313                           | 2215        |
| 9      | stem, 5 days before heading        | 10                        | 19          | 4992                           | 4614        |
| 10     | flag leaf, 5 days before heading   | 26                        | 22          | 1978                           | 2278        |
| 11     | stem, heading stage                | 10                        | 0           | 7341                           | 4668        |
| 12     | panicle, heading stage             | 7                         | 24          | 10015                          | 6358        |
| 13     | leaf, 4-5cm young panicle          | 26                        | 19          | 4760                           | 2898        |
| 14     | sheath, 4-5cm young panicle        | 3                         | 16          | 3866                           | 3918        |

|    |                                     |    |    |       |      |
|----|-------------------------------------|----|----|-------|------|
| 15 | panicle, 4-5cm young panicle        | 9  | 11 | 5528  | 4525 |
| 16 | hull, one day before flowering      | 16 | 10 | 5114  | 4691 |
| 17 | stamen, one day before flowering    | 12 | 14 | 21412 | 8720 |
| 18 | spikelet, 3 days after pollination  | 8  | 10 | 6496  | 5176 |
| 19 | endosperm, 7 days after pollination | 19 | 14 | 8798  | 6619 |

a. Informations obtained from CREP (<http://crep.ncpgr.cn>).

b. Signal values represent average hybridization signal values. Minghui 63 and Zhenshan 97 are *indica* rice variety.

**Supplemental Table S2.** Primers used in this work

| Purpose      | Primer Name | Accession No.                                  | Sequence (5' – 3')        | Source                                                            |
|--------------|-------------|------------------------------------------------|---------------------------|-------------------------------------------------------------------|
| Fine Mapping | RM222       |                                                | CTTAAATGGGCCACATGCG       | Gramene                                                           |
|              |             |                                                | CAAAGCTTCCGGCCAAAAG       | ( <a href="http://www.gramene.org/">http://www.gramene.org/</a> ) |
|              | RM244       |                                                | CCGACTGTTCGTCCTTATCA      | Gramene                                                           |
|              |             |                                                | CTGCTCTCGGGTGAACGT        | ( <a href="http://www.gramene.org/">http://www.gramene.org/</a> ) |
|              | RM435       |                                                | ATTACGTGCATGTCTGGCTG      | Gramene                                                           |
|              |             |                                                | CGTACCTGACCATGCATCTG      | ( <a href="http://www.gramene.org/">http://www.gramene.org/</a> ) |
|              | RM540       |                                                | GCCTTCTGGCTCATTTATGC      | Gramene                                                           |
|              |             |                                                | CTAGGCCTGCCAGATTGAAC      | ( <a href="http://www.gramene.org/">http://www.gramene.org/</a> ) |
|              | RM586       |                                                | ACCTCGCGTTATTAGGTACCC     | Gramene                                                           |
|              |             |                                                | GAGATACGCCAACGAGATACC     | ( <a href="http://www.gramene.org/">http://www.gramene.org/</a> ) |
|              | RM588       |                                                | GTTGCTCTGCCTCACTCTTG      | Gramene                                                           |
|              |             |                                                | AACGAGCCAACGAAGCAG        | ( <a href="http://www.gramene.org/">http://www.gramene.org/</a> ) |
|              | RM589       |                                                | ATCATGGTTCGGTGGCTTAAC     | Gramene                                                           |
|              |             |                                                | CAGGTTCCAACCAGACACTG      | ( <a href="http://www.gramene.org/">http://www.gramene.org/</a> ) |
| BYL7         |             | AAGCTAGGGAATCAGCGGTTA<br>TGTGGCATGTCACTCACTCAC | Yang <i>et al.</i> , 2011 |                                                                   |
| BYL8         |             | CCCCTTCCACAACCACA                              | Yang <i>et al.</i> , 2011 |                                                                   |



|           |                      |            |                                                           |            |
|-----------|----------------------|------------|-----------------------------------------------------------|------------|
|           |                      |            | ATGCTCCTAGCTTCCTATTCC                                     |            |
|           | BID2                 |            | CACGTAATTATCGCGGTTAC<br>TACTAGGCAGGGTTCCTCTC              | This study |
|           | BID3                 |            | AAAATTTGAAACACGGGAAT<br>GAATATGCTTTGCATCAGTCA             | This study |
| <i>G4</i> | <i>G4</i> qRT-PCR    | Os06g01850 | ATAATGCTTGCGACCGGTAC<br>TGTCAAACTCCTCCTTGTAG              | This study |
|           | <i>G4</i> Vector     |            | GCACTAGTTTAGTAGACTTCCACGTT<br>GCGGTCACCATGGCCGCCGTCACGGCT | This study |
| <i>G5</i> | <i>G5</i> Sequencing | Os06g01860 | ATGGCCACCATTGTTGCATG<br>TCAAAGCTGCAAATCCAGCG              | This study |
|           | <i>G5</i> qRT-PCR    |            | CAAGGGATGGAGCCGATACG<br>AAAGCTGCAAATCCAGCGCC              | This study |
|           | <i>G5</i> Vector     |            | GCACTAGTATGGCCACCATTGTTGCA<br>GCGGTCACCTCAAAGCTGCAAATCCAG | This study |
|           | <i>G5</i> Promoter   |            | GCGGATCCGCTGGTTCCGAGCTAAGCC<br>GCGGTCACCGCTAGATCAAAGCTG   | This study |
|           | Hygromycin test      |            | ATTTGTGTACGCCCCGACAGT<br>CTCTCGGAGGGCGAAGAATC             | This study |

|                          |                 |              |                                                    |                          |
|--------------------------|-----------------|--------------|----------------------------------------------------|--------------------------|
| Defense<br>related genes | <i>OsActin1</i> | Os03g0718100 | TCTGGCATCACACCTTCTACA<br>GGAAGGCTGGAAGAGGAC        | This study               |
|                          | <i>PR10</i>     | D38170       | CCCTGCCGAATACGCCTAA<br>CTCAAACGCCACGAGAATTTG       | Qiu <i>et al.</i> , 2007 |
|                          | <i>PAL</i>      | X87946       | GCACATCTTGGAGGGAAGCT<br>GCGCGGATAACCTCAATTTG       | Du <i>et al.</i> , 2009  |
|                          | <i>CHS</i>      | X89859       | CCGGCGAACTGCGTGTAC<br>TTCCTGATCTGCGACTTGTC         | Qiu <i>et al.</i> , 2007 |
|                          | <i>NPR1</i>     | AY923983     | TTTCCGATGGAGGCAAGAG<br>GCTGTCATCCGAGCTAAGTGTT      | Du <i>et al.</i> , 2009  |
|                          | <i>AOS2</i>     | AY062258     | CTCGTCGGAAGGCTGTTGCT<br>ACGATTGACGGCGGAGGTT        | Du <i>et al.</i> , 2009  |
|                          | <i>LOX</i>      | D14000       | GCATCCCCAACAGCACATC<br>AATAAAGATTTGGGAGTGACATATTGG | Qiu <i>et al.</i> , 2007 |
|                          | <i>EIN2</i>     | AY396568     | CAAGGAACCAGTGACAACCA<br>GCAGTCGTCTCCGCAGTTAG       | Du <i>et al.</i> , 2009  |
